# Supplementary material for: Mapping Metabolite and ICD-10 Associations
Source: MDPI journal article supplement (doi:10.3390/metabo10050196), 2020-05-14

Supplementary Figure S1. Biomarker candidate resistance to disease pooling.

Significance (gray line  $p < 0.05$ , red line  $p < 0.001$ ) of AUC-ROC value after pairwise pooling of diagnose codes for which the specified metabolite appeared as a potential marker. The size of vertexes depends on the AUC-ROC value for the diagnose code if analyzed independently of comorbidities.

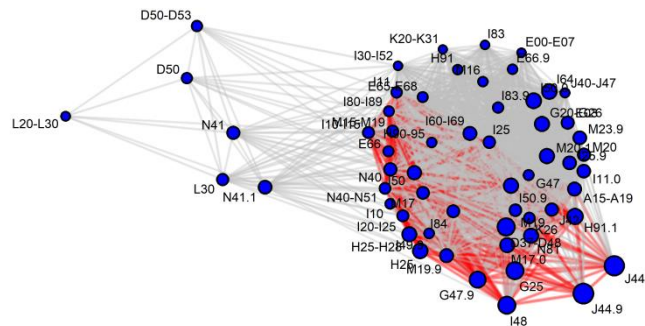

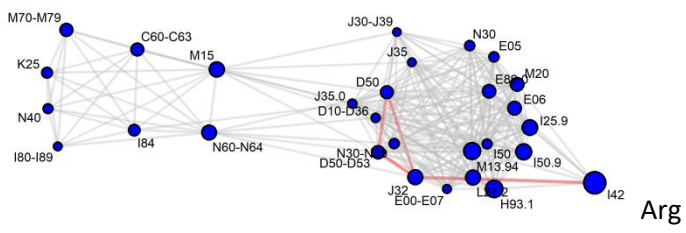

Arg

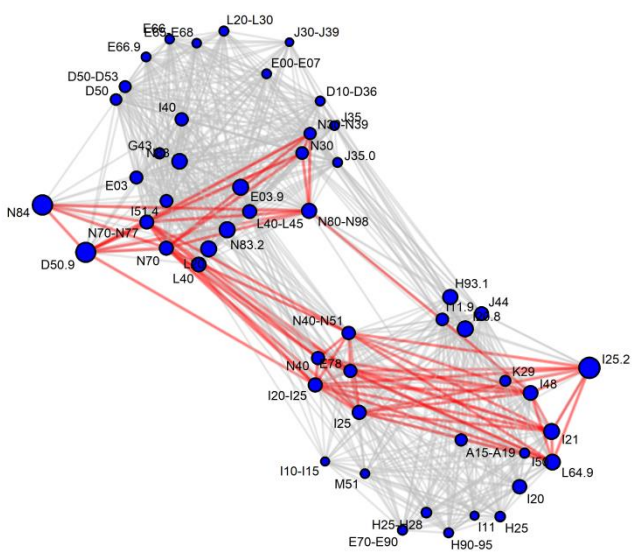

Betaine

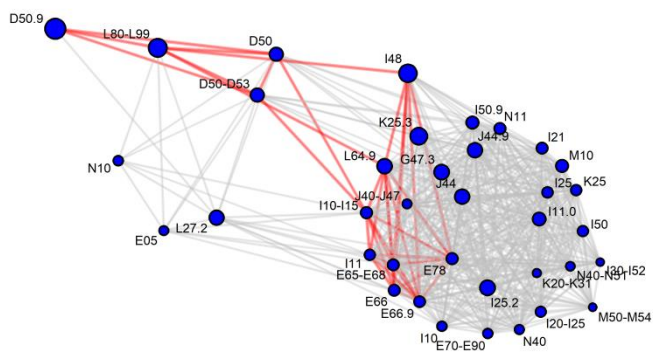

Free carnitine

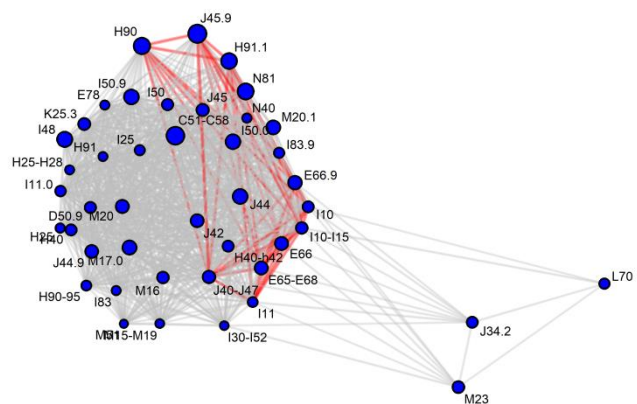

C2 carnitine

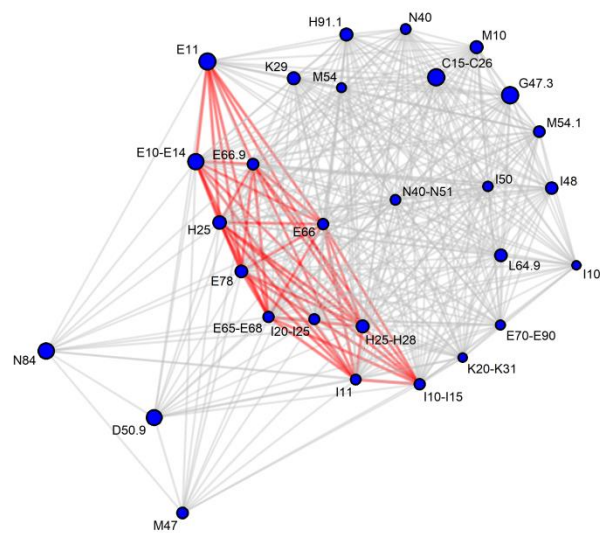

C3 carnitine

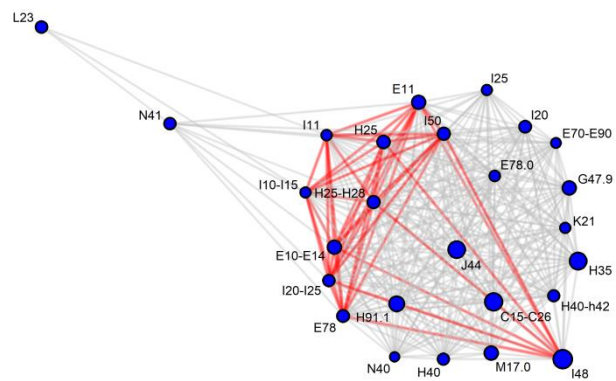

C4 carnitine

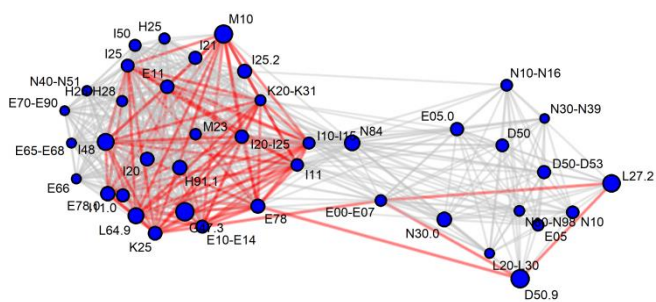

C5 carnitine

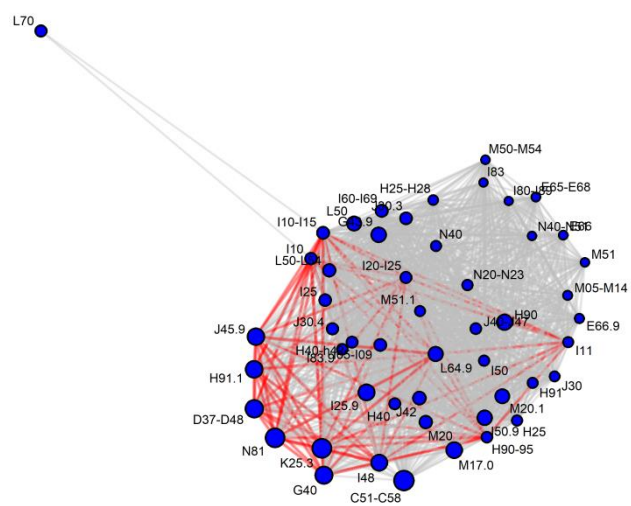

C16 carnitine

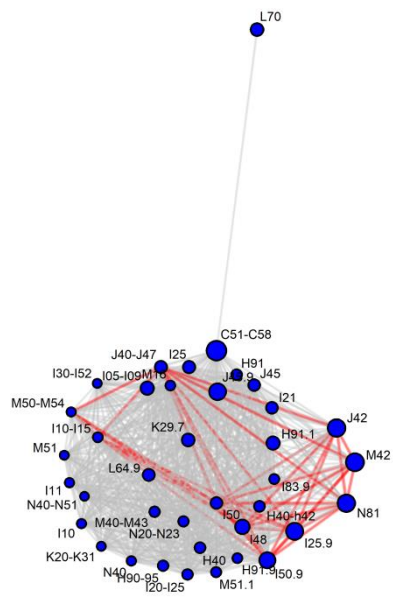

C18 carnitine

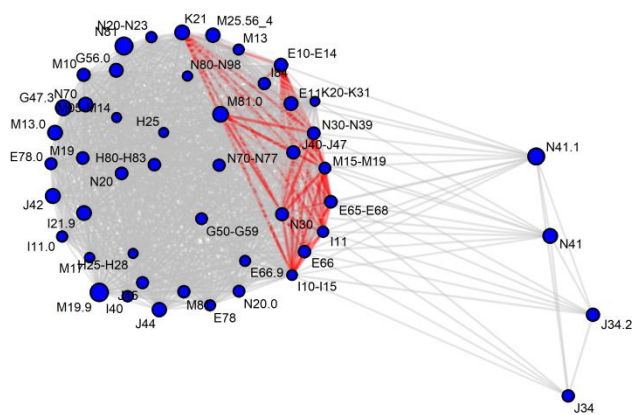

Creatine

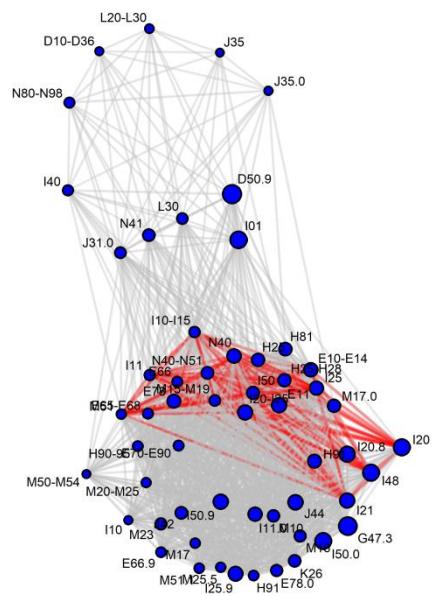

DiMeGly

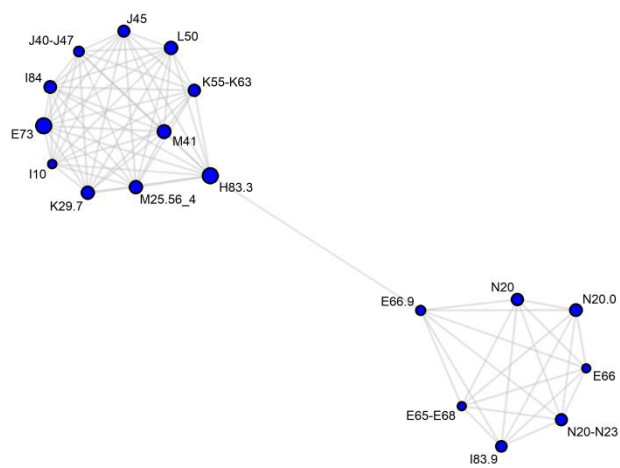

Eicosapentanoic acid

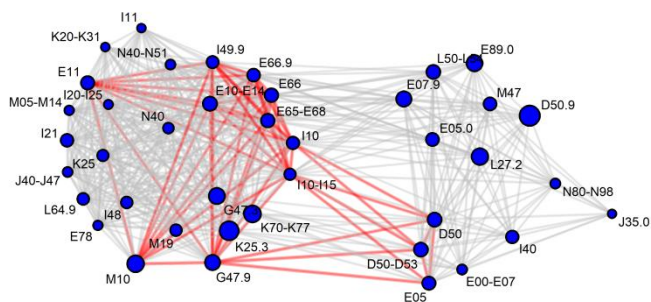

Glu

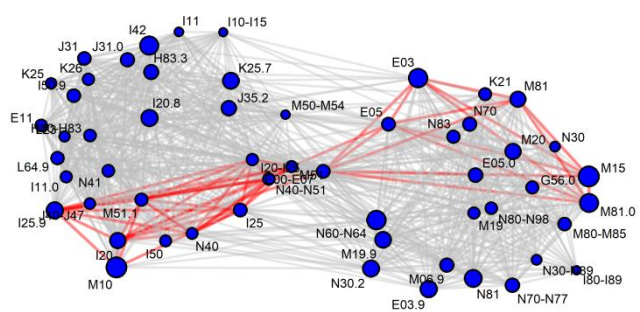

Gly

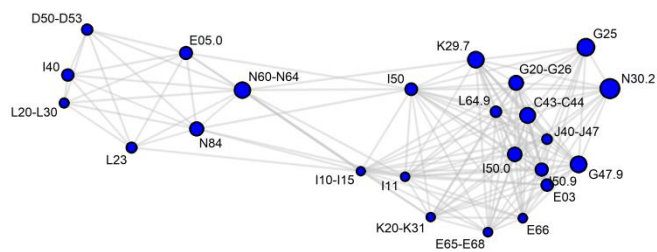

HCys



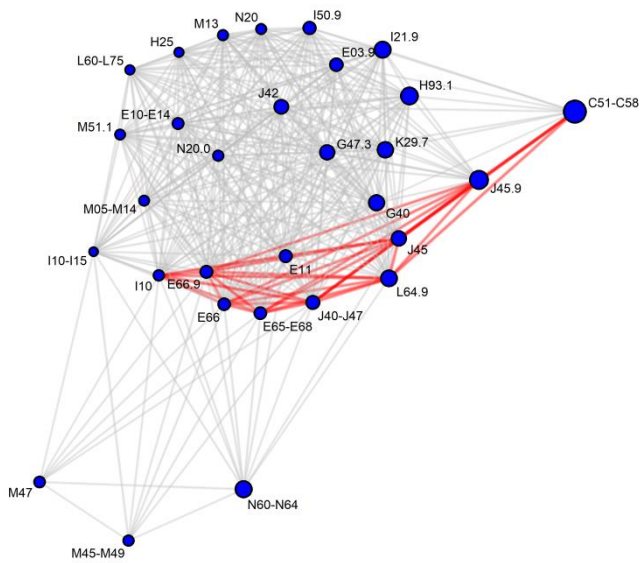

Hexoses

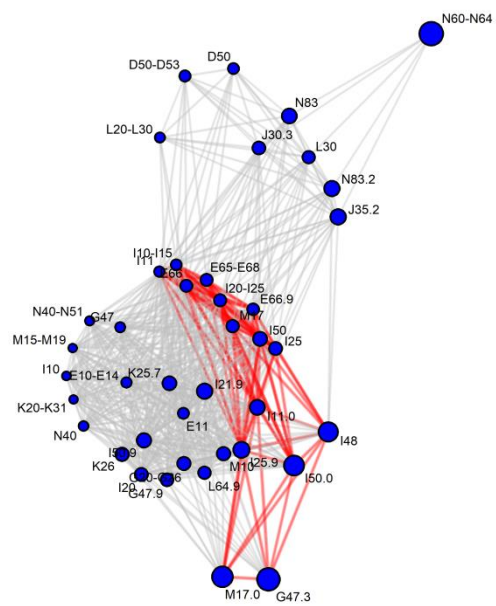

Kynurenic acid



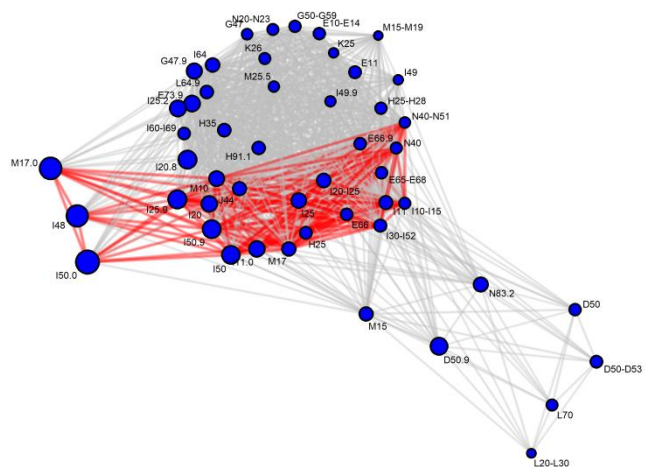

Kynurenin

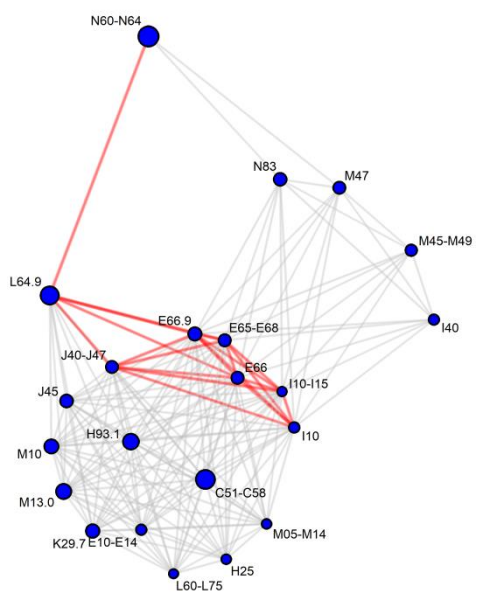

Lactate

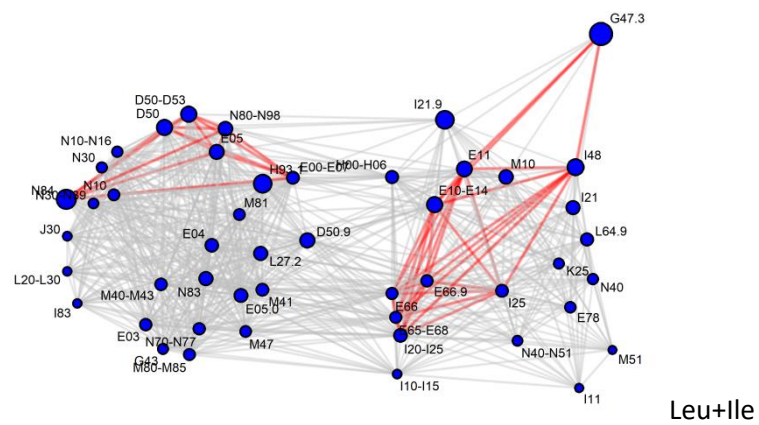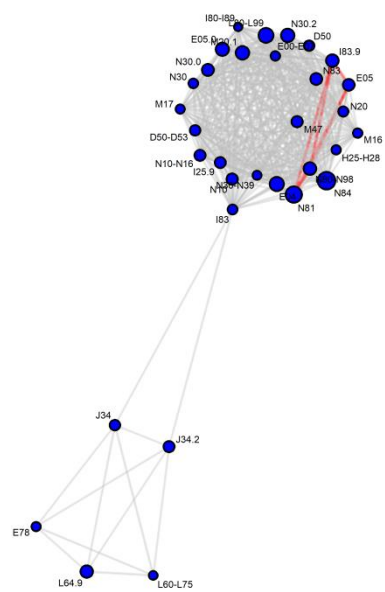

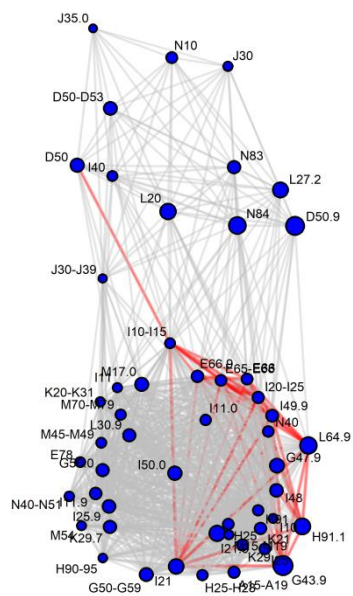

Orn

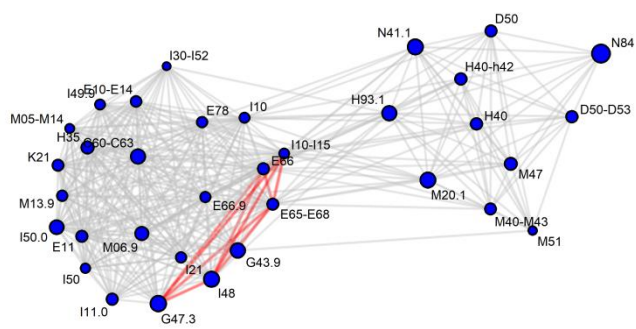

Phe

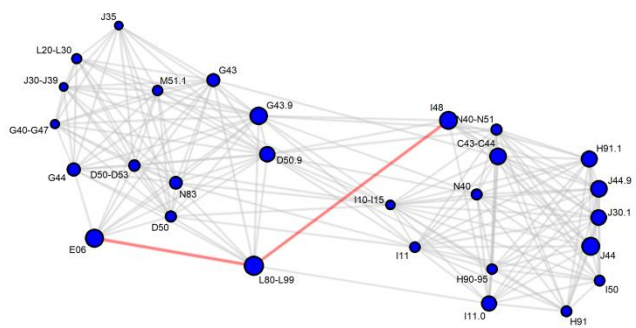

SDMA



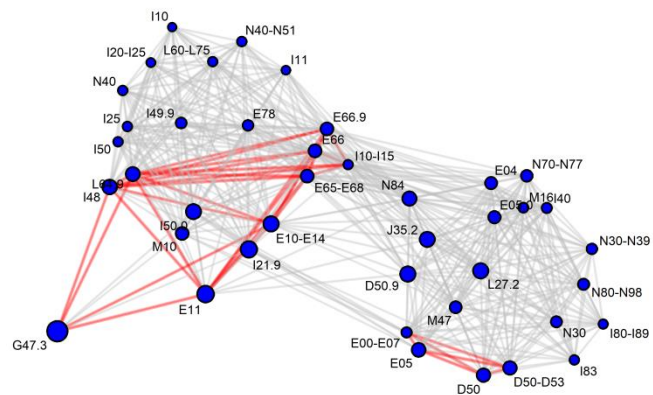

Val

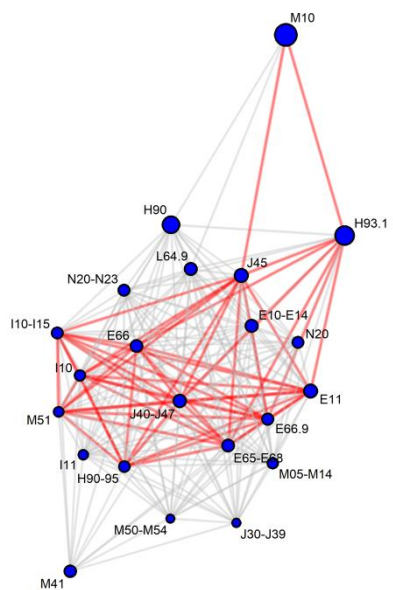

2-hydroxybutyrate

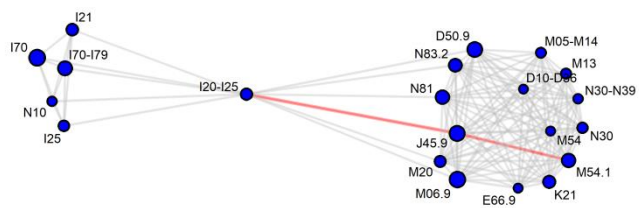

LysoPC(C16:0)

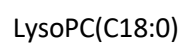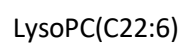

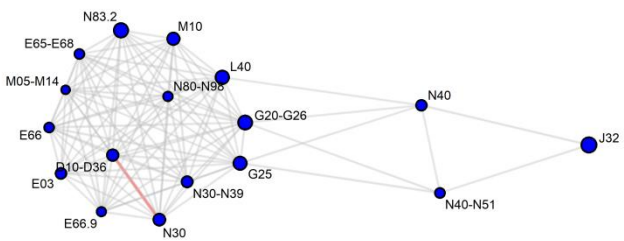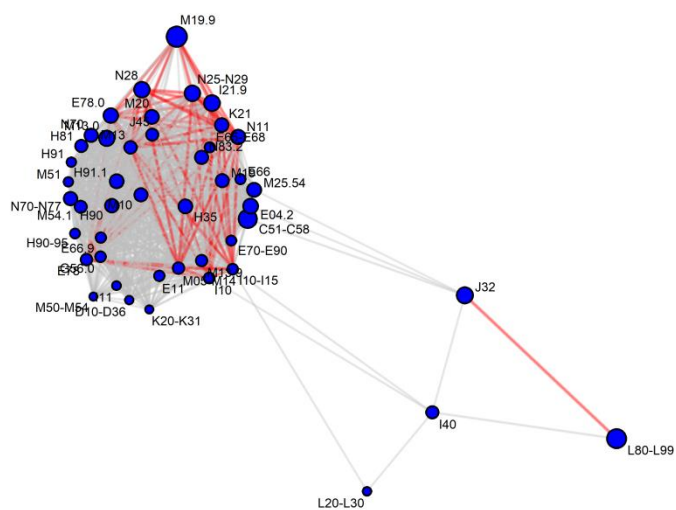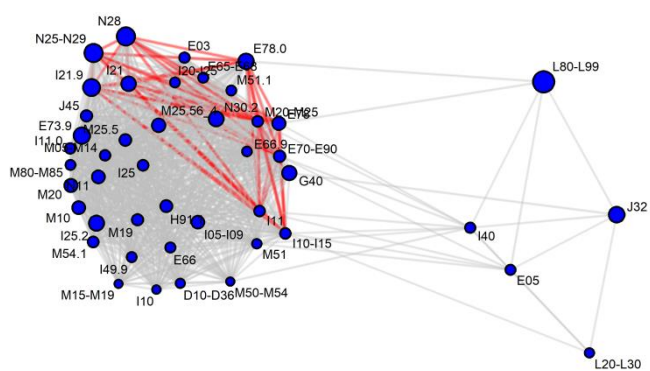

Supplement: s1 [file s1]
